# Supplementary material for: A Mouse Model of Human Hyperinsulinism Produced by the E1506K Mutation in the Sulphonylurea Receptor SUR1
Source: Oxford University Press journal article supplement (doi:10.2337/db12-1611), 2013-08-01

SUPPLEMENTARY DATA

**Supplementary Table 1.** Electrophysiological properties of wild-type and mutant beta-cells

|                      | Wild-type       | hetE1506K       | homE1506K<br>(2-month old) | homE1506K<br>(6-month old) |
|----------------------|-----------------|-----------------|----------------------------|----------------------------|
| $IC_{50}$ ( $\mu$ M) | 33.8 $\pm$ 7.4  | 14.2 $\pm$ 1.5  | 10.2 $\pm$ 0.75            | 9.25 $\pm$ 0.91            |
| $h$                  | 1.14 $\pm$ 0.17 | 0.95 $\pm$ 0.09 | 1.07 $\pm$ 0.09            | 1.09 $\pm$ 0.11            |
| n                    | 6               | 7               | 7                          | 7                          |
| Spiking              | 0/20            | 15/30           | 19/30                      | 21/30                      |
| $K_{ATP}$ activity   | 15/20           | 20/30           | 4/30                       | 1/30                       |

Mean $\pm$ SEM values for the ATP concentration producing half-maximal inhibition of  $K_{ATP}$  currents ( $IC_{50}$ ), and the slope factor ( $h$ ), used to fit the ATP concentration-inhibition curves for  $n$  patches.  $IC_{50}$  and  $h$  values are the mean of the fits of equation 1 to the individual dose-response curves. Spiking and  $K_{ATP}$  activity data refer to the number of patches exhibiting activity out of the total number of patches measured.

**Supplementary Figure 1.** Relative expression of the SUR1 gene in 6 month-old WT, hetE1506K and homE1506K islets. Data are expressed relative to a panel of house-keeping genes. Data are the mean  $\pm$  SEM of WT (n=2), hetE1506K (n=4) and homE1506K (n=4) 6-month-old mice.

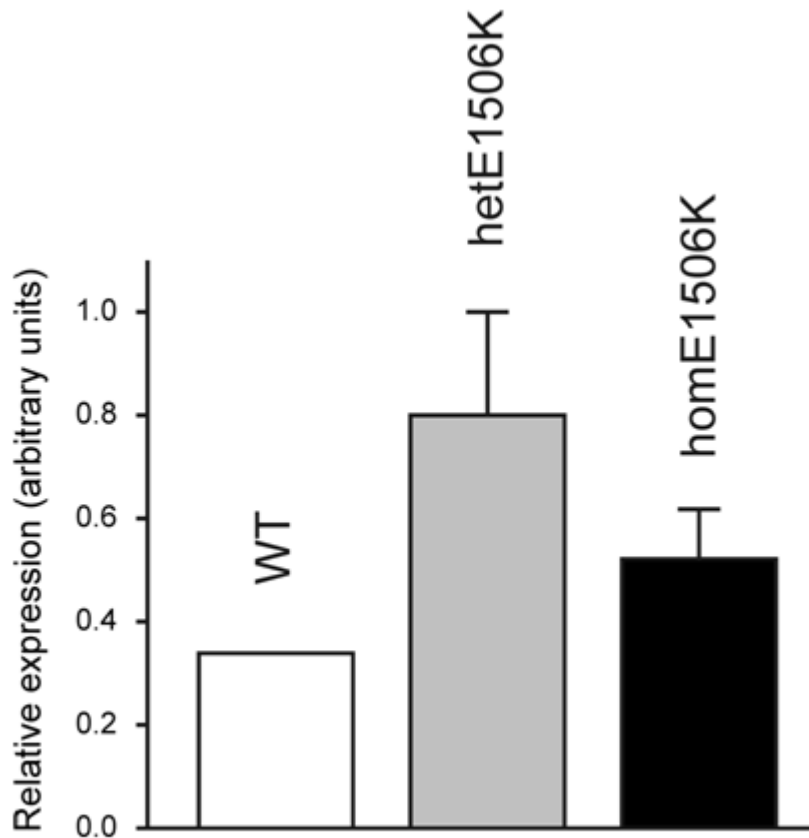

SUPPLEMENTARY DATA

**Supplementary Figure 2.** Examples of peak macroscopic  $K_{ATP}$  currents recorded from inside-out patches immediately after patch excision, from 2-month-old wild-type, hetE1506K and homE1506K mice as indicated and from 6-month old (hom<sub>OLD</sub>E1506K) mice, as indicated. Currents were recorded at -60mV in nucleotide-free solutions. The dotted line indicates zero current level.

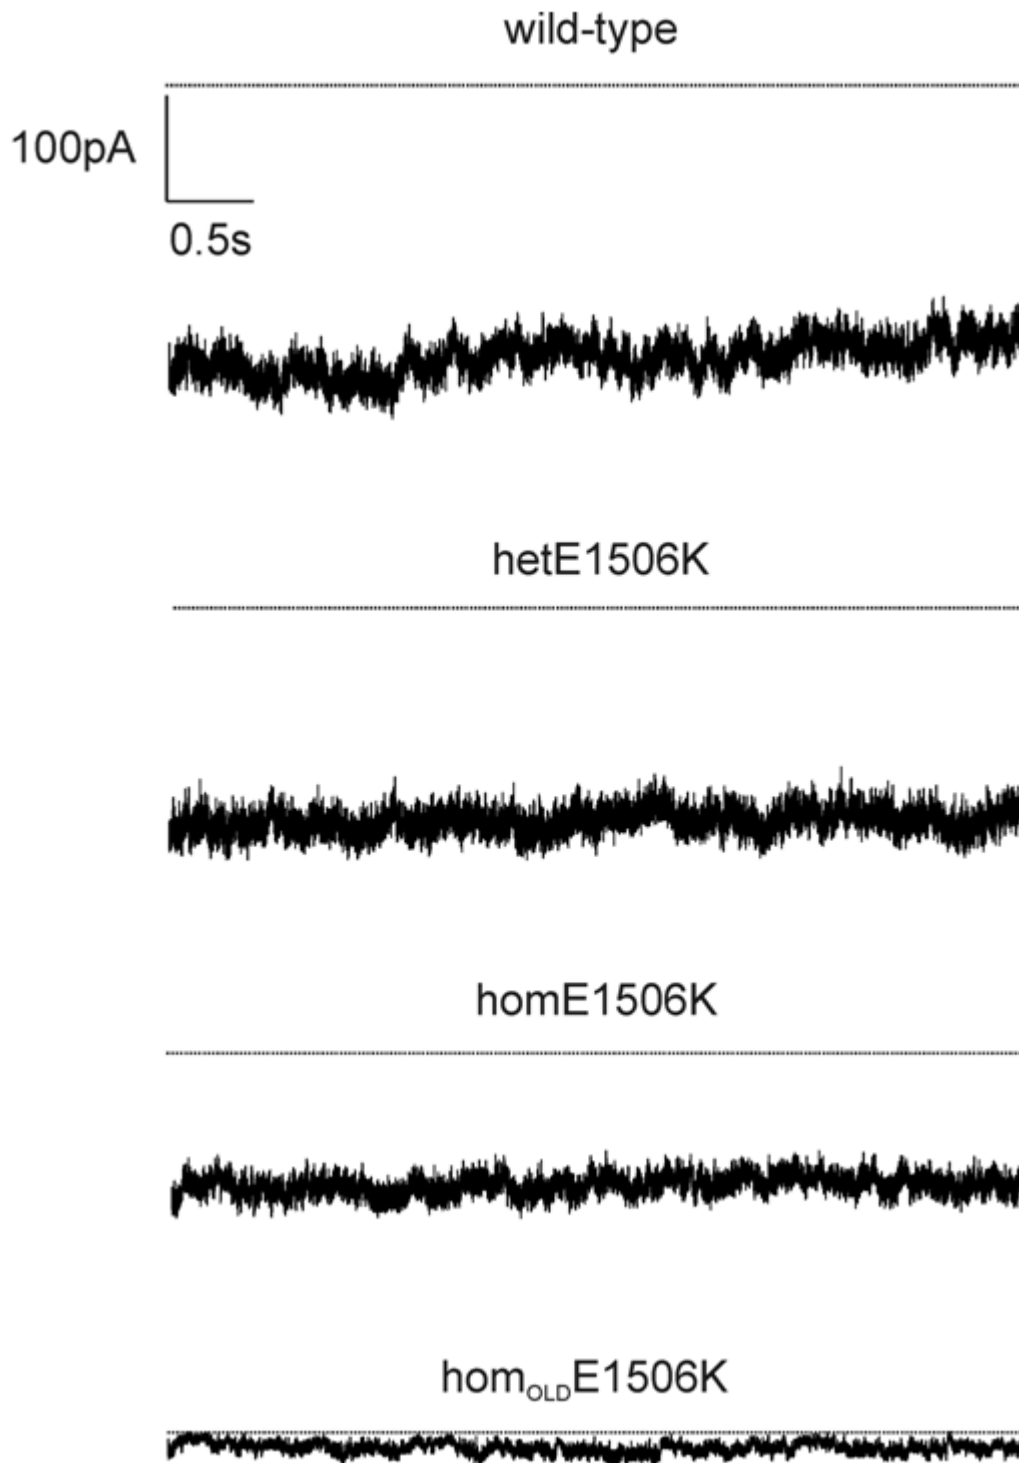

SUPPLEMENTARY DATA

**Supplementary Figure 3.** Mean $\pm$ SEM MgATP concentration-inhibition relationships for  $K_{ATP}$  currents recorded from beta-cells isolated from 6-month old homE1506K (black circles,  $n=7$  patches, 3 mice) mice. Current ( $I$ ) is expressed relative to that in ATP-free solution ( $I_c$ ). The solid line is the best fit of equation 1 to the mean data with  $IC_{50}=9.1\mu M$ ,  $h=1.1$ . The dashed line indicates the mean fit to the data obtained from 2-month-old homE1506K mice.

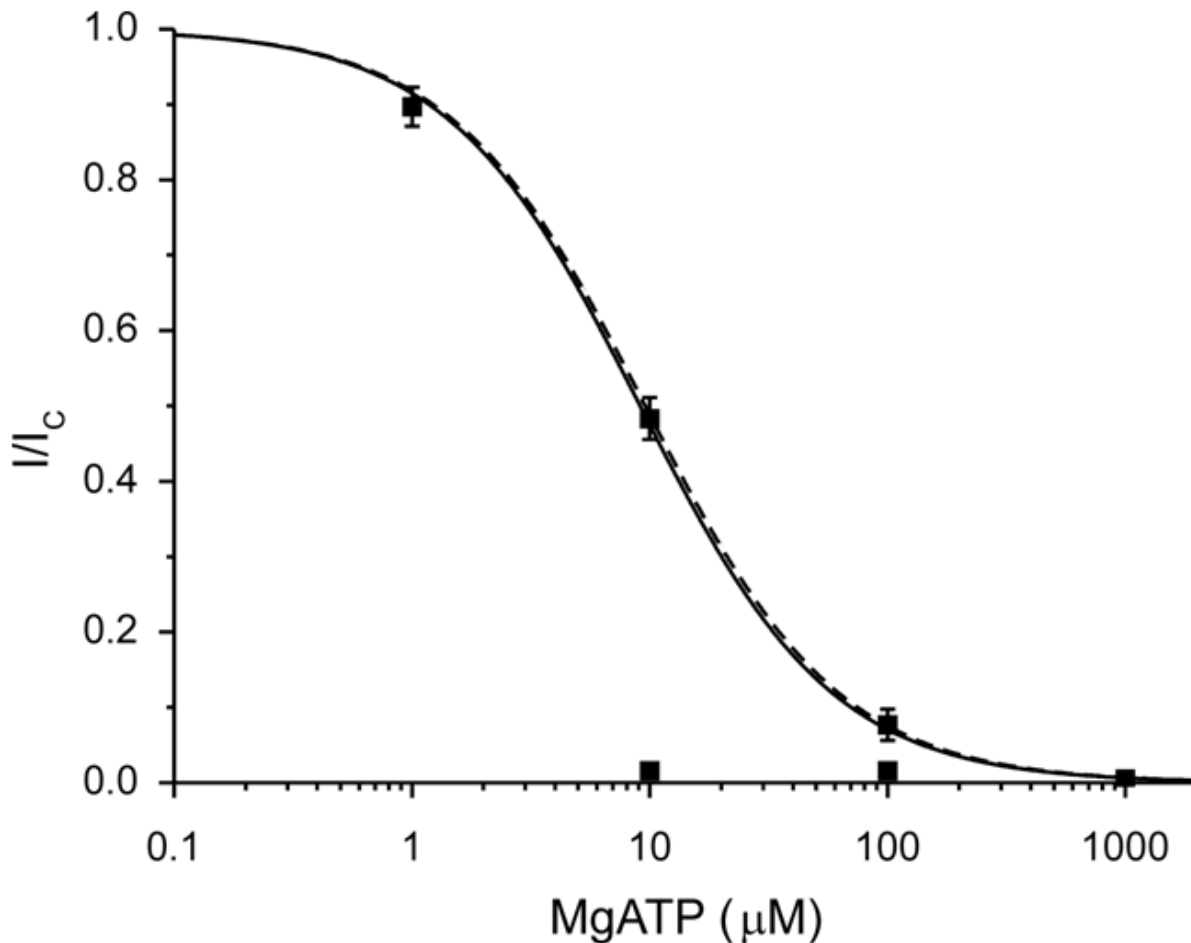

**Supplementary Figure 4.** A-C. Representative  $Ca^{2+}$  responses recorded from 5-6 week-old wild-type (A), het-E1506K (B) and hom-E1506K (C) islets. D. Percentage of islets showing spontaneous  $Ca^{2+}$  oscillations in 2 mM glucose (WT = 2/18, het-E1506K = 8/17, hom-E1506K = 21/25). Significance was verified by the Fisher's exact test. E. Mean data ( $\pm$  SEM) showing the average  $Ca^{2+}$  level in 2 mM glucose, the peak value in 10 mM glucose and the peak value in 0.2 mM tolbutamide plus 10 mM glucose. Black bars, WT; blue bars, hetE1506K; red bars, homE1506K. F. Mean data ( $\pm$  SEM) showing  $Ca^{2+}$  responses averaged over 3.5 min in 2 mM glucose, 10 mM glucose and 0.2 mM tolbutamide plus 10 mM glucose. Black bars, WT; blue bars, hetE1506K; red bars, homE1506K. D-F. Data are the mean  $\pm$  SEM of 18 islets isolated from 4 WT mice, 17 islets isolated from 3 het-E1506K mice and 25 islets from 3 hom-E1506K mice. Significance was tested using a One-Way ANOVA test and the Bonferroni post-test. Compared groups: WT with het-E1506K (\*), WT with hom-E1506K (#) and het-E1506K with hom-E1506K ( $\dagger$ ). As islets were stimulated consecutively with glucose and tolbutamide, the paired t-test ( $\ddagger$ ) was used to compare the data between different stimuli. \*,#, $\dagger$ , $\ddagger$   $p < 0.05$ .

SUPPLEMENTARY DATA

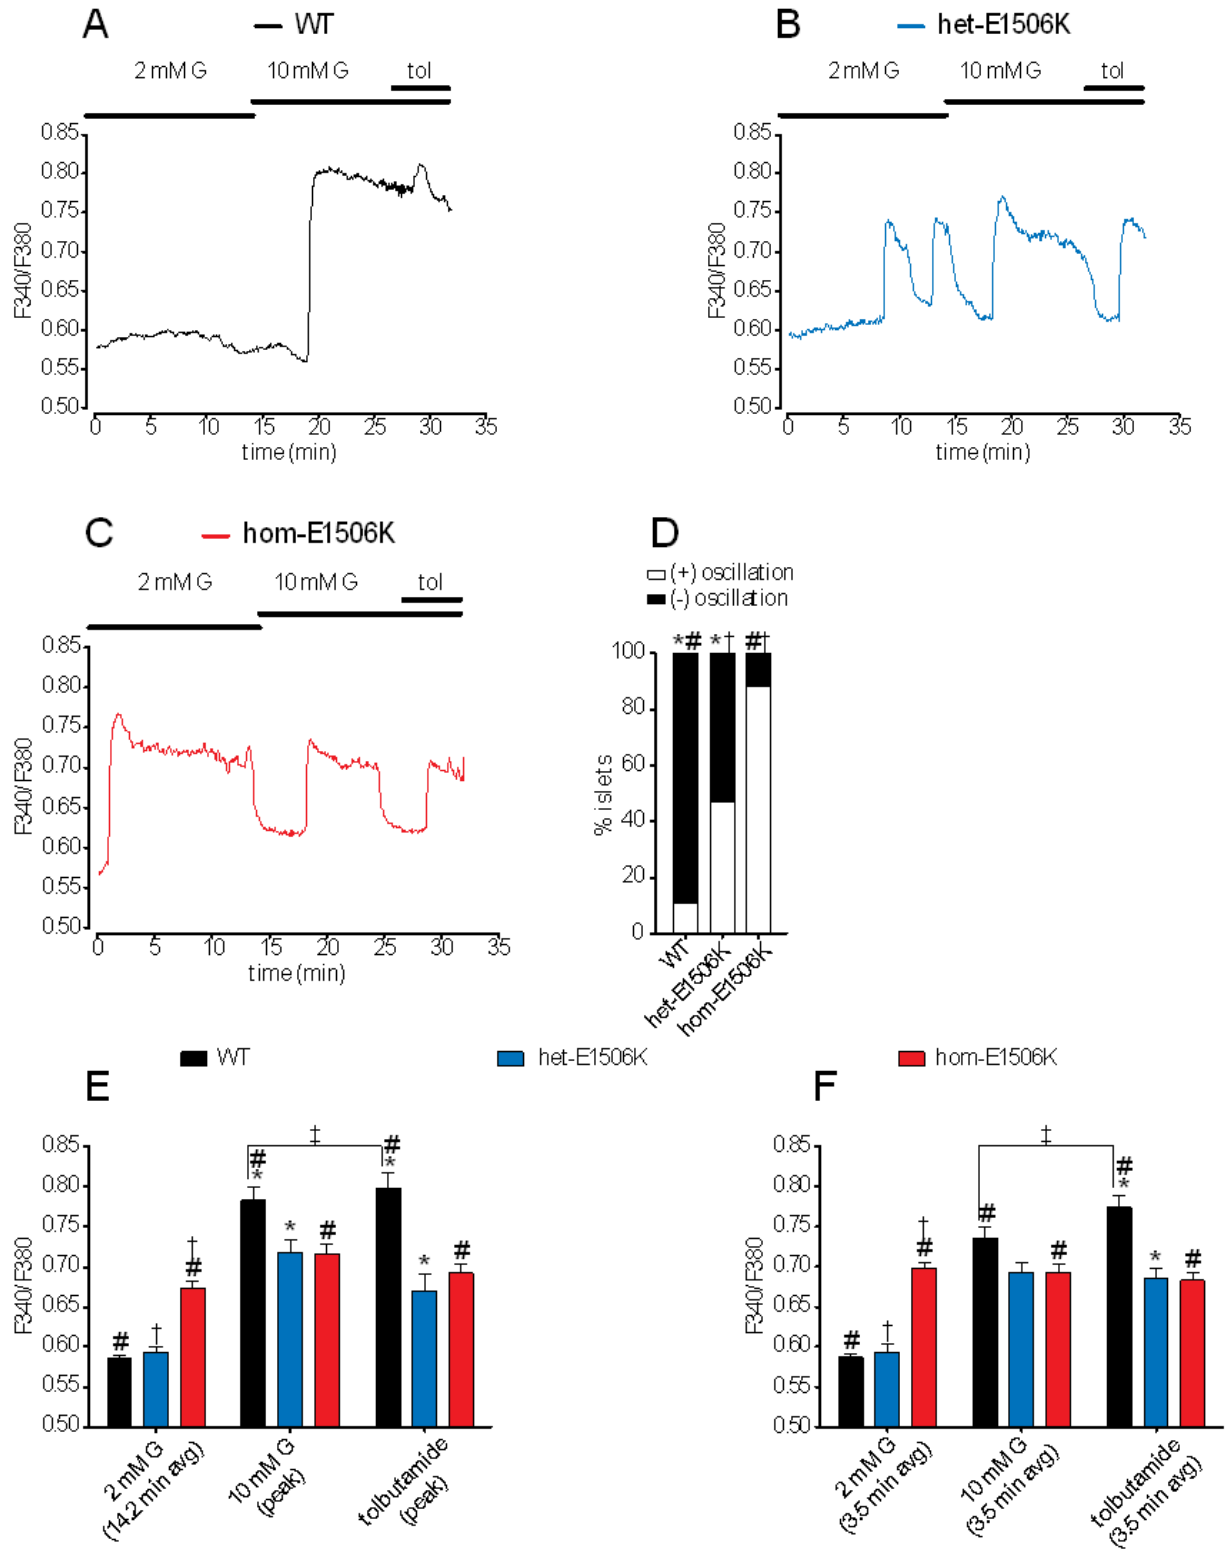

SUPPLEMENTARY DATA

**Supplementary Figure 5.** A-C. Representative  $\text{Ca}^{2+}$  responses recorded from 7-14 month-old wild-type (A), het-E1506K (B) and hom-E1506K (C) islets. D. Percentage of islets showing spontaneous  $\text{Ca}^{2+}$  oscillations in 2 mM glucose (WT = 0/11, het-E1506K = 4/22, hom-E1506K = 0/11). Data were not significantly different (Chi-square test). E. Mean data ( $\pm$  SEM) showing the average  $\text{Ca}^{2+}$  level at 2 mM glucose, the peak value at 10 mM glucose and the peak value at tolbutamide plus 10 mM glucose. Black bars, WT; blue bars, hetE1506K; red bars, homE1506K. F. Mean data ( $\pm$  SEM) showing  $\text{Ca}^{2+}$  responses averaged over 3.5 min at 2 mM glucose, 10 mM glucose and tolbutamide plus 10 mM glucose. Black bars, WT; blue bars, hetE1506K; red bars, homE1506K. D-F. Data are the mean  $\pm$  SEM of 11 islets (2 WT mice), 22 islets (5 het-E1506K mice) and 11 islets (2 hom-E1506K mice). E,F. Significance was tested using a One-Way ANOVA test and the Bonferroni post-test. Compared groups: WT with het-E1506K (\*), WT with hom-E1506K (#) and het-E1506K with hom-E1506K (†). \*,#,†,‡  $p < 0.05$ .

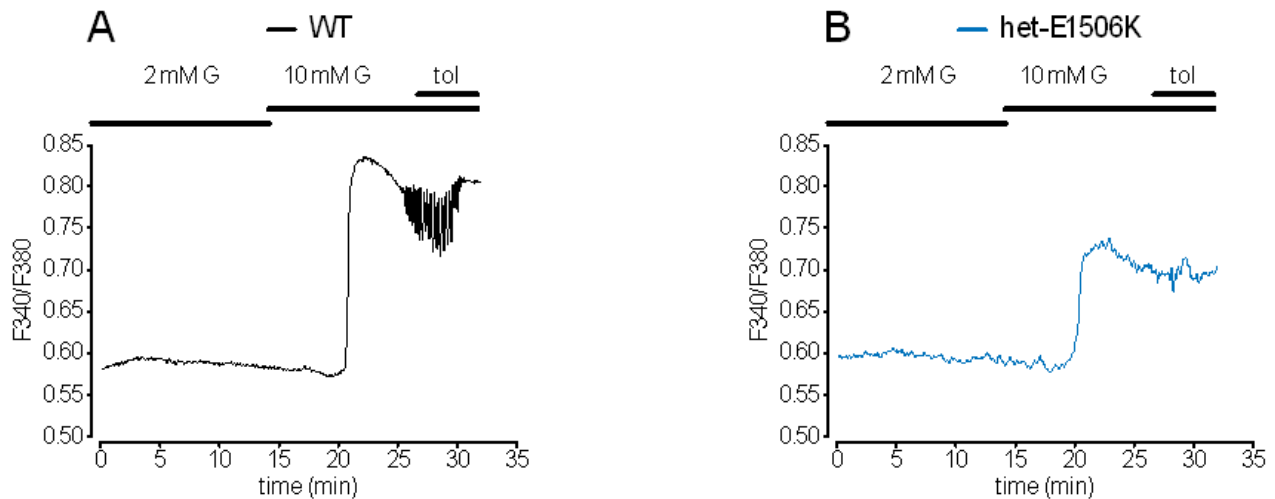

SUPPLEMENTARY DATA

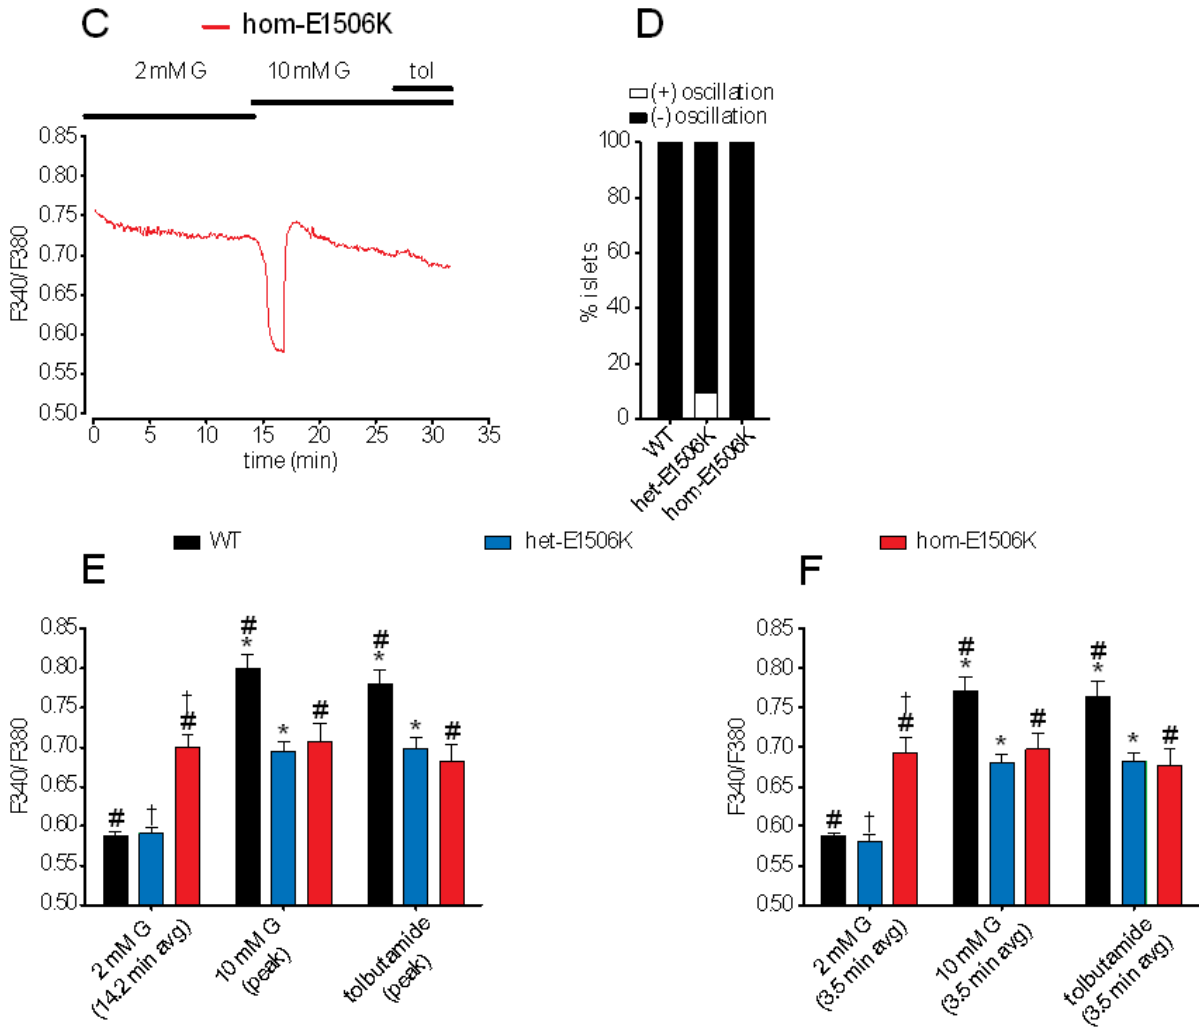

SUPPLEMENTARY DATA

**Supplementary Figure 6.** Mean±SEM body weight of 2-month-old WT (n=5), hetE1506K (grey bar, n=8) and homE1506K (black bar, n=6) mice; and of 6-month old WT (n=4), hetE1506K (n=4) and homE1506K (n=4) mice.

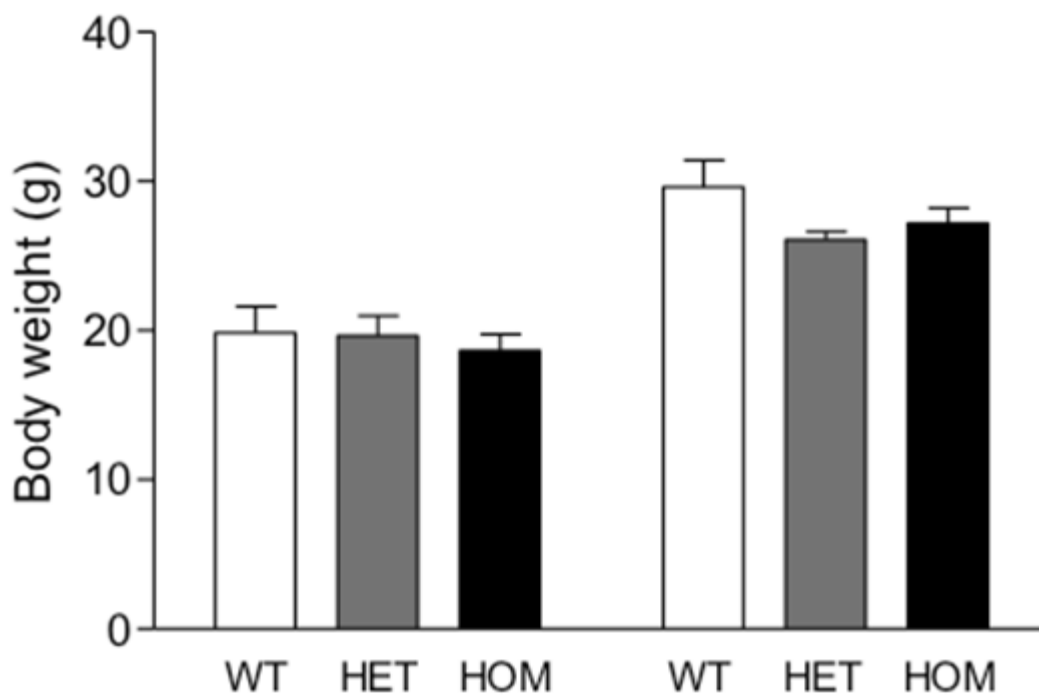

SUPPLEMENTARY DATA

**Supplementary Figure 7.** Insulin tolerance test for 12-month-old WT (n=11), hetE1506K (n=12) and homeE1506K (n=9) mice. Mice were fasted for 4 hours and a fasted blood sample was taken prior to intraperitoneal administration of 0.25mU/g insulin. Subsequent blood samples were taken over time from a tail vein under local anaesthesia (5% Emla cream, AstraZeneca) for glucose measurement. Glucose was measured using a Precision Xtra glucometer (Abbott)

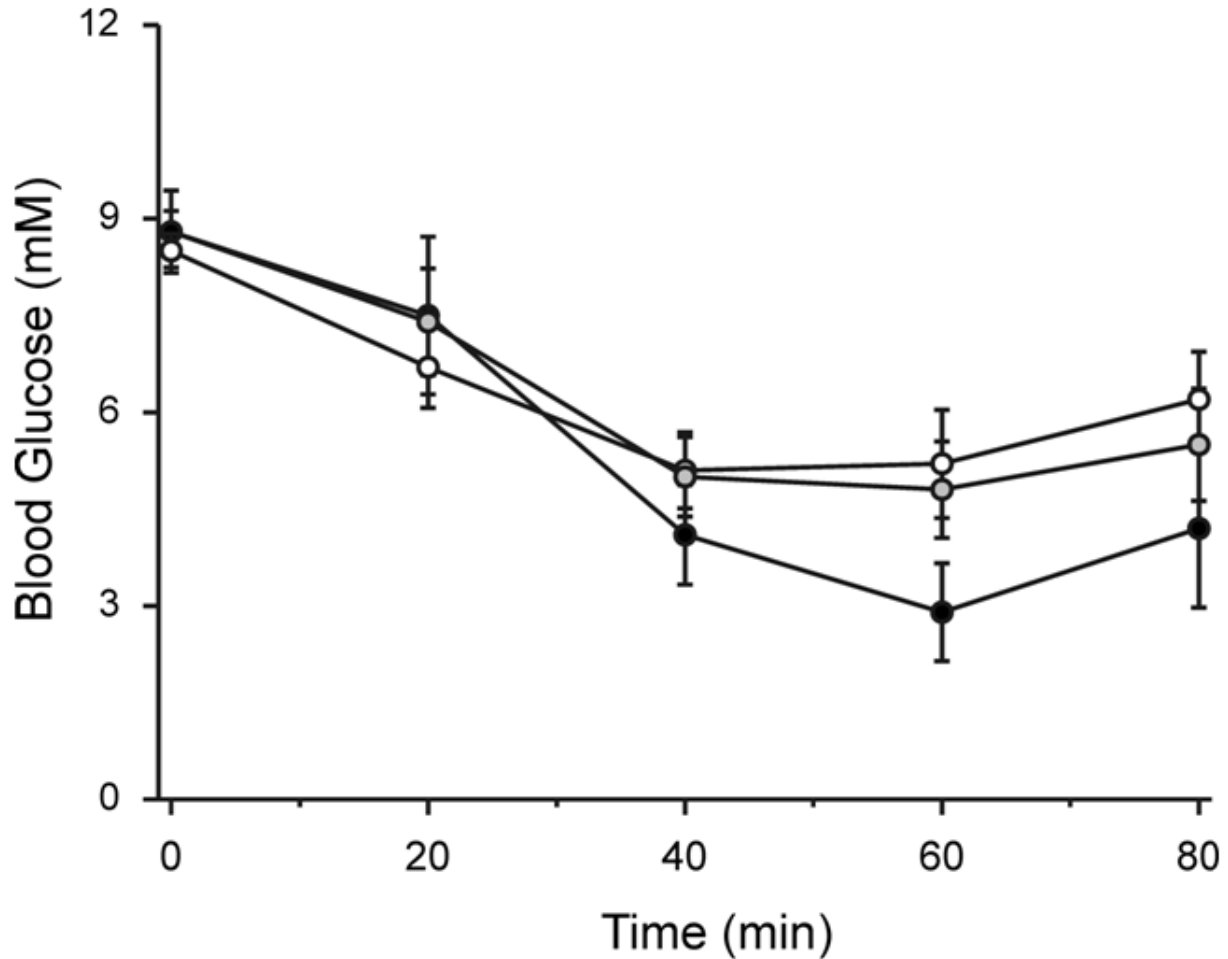



## SUPPLEMENTARY DATA

**Supplementary Figure 8.** A. Mean $\pm$ SEM post-prandial plasma glucose levels in 2-month-old WT (n=5), hetE1506K (n=8) and homE1506K (n=6) mice. Glucose was measured at 2pm. B. Mean $\pm$ SEM plasma insulin levels in 2-month-old WT (n=5), hetE1506K (n=5) and homE1506K (n=5) mice. Mice were fasted overnight and insulin was measured 30min after injection of 2g/kg body weight glucose.

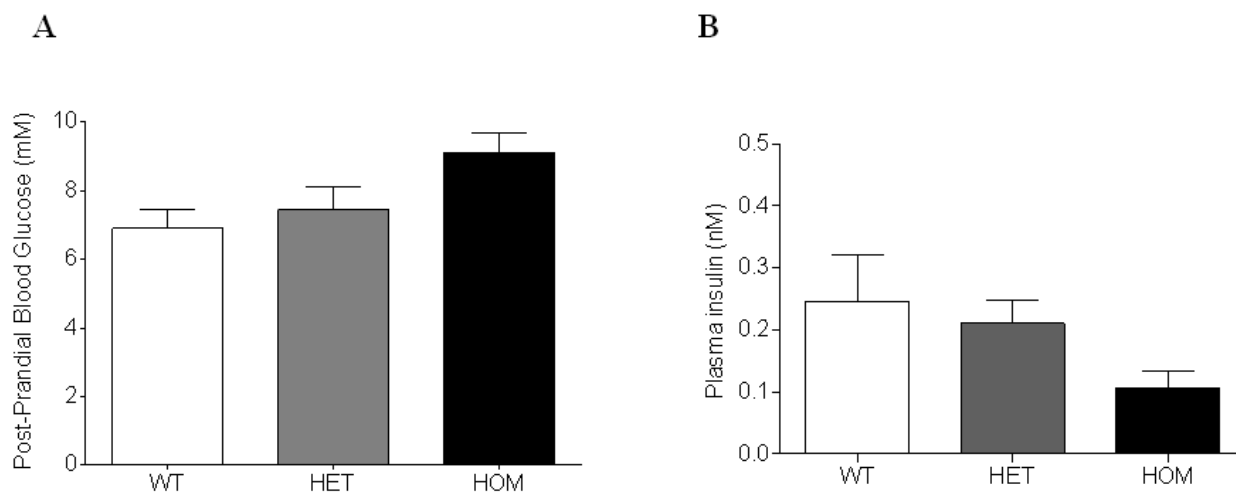

Supplement: db121611supplementarydata.pdf [file db121611supplementarydata.pdf]
